# Supplementary material
Source: PubMed Central journal article supplement (PMC3061198)
Supplement: Supp_Data.pdf [file Supp_Data.pdf]

# Supplementary Data

SUPPLEMENTARY TABLE S1. STRAINS AND PLASMID USED IN THIS RESEARCH

| <i>Strains or plasmid</i> | <i>Relevant genotype and features</i>                       | <i>Source</i>         |
|---------------------------|-------------------------------------------------------------|-----------------------|
| <b>Plasmids</b>           |                                                             |                       |
| pDHB5747                  | Amp <sup>r</sup> pBR-based vector with phoA gene (pGA4ΔBsp) | (1)                   |
| pXW41                     | Based on pDHB5747, with His-VKOR-AP fusion 210              | This study            |
| pXW58                     | Based on pDHB5747, with His-VKOR-AP fusion 188              | This study            |
| pXW43                     | Based on pDHB5747, with His-VKOR-AP fusion 137              | This study            |
| pXW56                     | Based on pDHB5747, with His-VKOR-AP fusion 110              | This study            |
| pXW52                     | Based on pDHB5747, with His-VKOR-AP fusion 82               | This study            |
| pXW80                     | Based on pDHB5747, with VKOR-AP fusion 210                  | This study            |
| pXW73                     | Based on pDHB5747, with VKOR-AP fusion 188                  | This study            |
| pXW74                     | Based on pDHB5747, with VKOR-AP fusion 137                  | This study            |
| pXW90                     | Based on pDHB5747, with VKOR-AP fusion 110                  | This study            |
| pXW82                     | Based on pDHB5747, with VKOR-AP fusion 82                   | This study            |
| pTrc99a                   | Empty vector                                                | (2)                   |
| pRD33                     | pTrc99a with wild-type VKOR                                 | This study            |
| pXW131                    | pTrc99a with VKOR-C139A, C142A                              | This study            |
| pXW135                    | pTrc99a with VKOR-C139A                                     | This study            |
| pXW138                    | pTrc99a with VKOR-C57A                                      | This study            |
| pXW139                    | pTrc99a with VKOR-C65A                                      | This study            |
| pXW140                    | pTrc99a with VKOR-C57A, C65A                                | This study            |
| pXW141                    | pTrc99a with VKOR-C142A                                     | This study            |
| pXY115                    | pTetG with VKOR-C57A                                        | This study            |
| pXY116                    | pTetG with VKOR-C65A                                        | This study            |
| pXY117                    | pTetG with VKOR-C57A, C65A                                  | This study            |
| pXY118                    | pTetG with VKOR-C139A                                       | This study            |
| pXY119                    | pTetG with VKOR-C142A                                       | This study            |
| pXY120                    | pTetG with VKOR-C139A, C142A                                | This study            |
| pXY121                    | pTetG with VKOR-wild type                                   | (3)                   |
| <b>Strains</b>            |                                                             |                       |
| DHB250                    | pACYClacIq-CAM / DHB4 pcnB80:Tn10                           | Laboratory collection |
| FA113                     | DHB4 gor522... mini-Tn10Tc trxB::Km supp                    | Laboratory collection |
| XW106                     | FA113 λInch1 pXW 41 Δ(latt-lom)::bla                        | This study            |
| XW107                     | FA113 λInch1 pXW 58 Δ(latt-lom)::bla                        | This study            |
| XW108                     | FA113 λInch1 pXW 43 Δ(latt-lom)::bla                        | This study            |
| XW109                     | FA113 λInch1 pXW 56 Δ(latt-lom)::bla                        | This study            |
| XW110                     | FA113 λInch1 pXW 52 Δ(latt-lom)::bla                        | This study            |
| HK320                     | F-Δara-714 galU galK D(lac)X74 rpsL thi ΔdsbB               | Laboratory collection |
| HK329                     | F-Δara-714 galU galK D(lac)X74 rpsL thi ΔdsbAΔdsbB          | Laboratory collection |

SUPPLEMENTARY TABLE S2. PRIMERS USED IN THIS WORK

| Name                           | Sequence (5' to 3')                                     |
|--------------------------------|---------------------------------------------------------|
| 5' primer for all five fusions | CAGACGCGTATGGTTGCAGCGCGACCT                             |
| F210 3' primer                 | CGATCCGGACCGATCAGCGTCGACCAATAGTCCC                      |
| F188 3' primer                 | CAGTCCGGACCCCGTGGCCAGCGACCATCG                          |
| F137 3' primer                 | TGATCCGGACCCGGACCGATACGGTACAGGC                         |
| F110 3' primer                 | GACTCCGGACCCCAATACCACCTGGGCAACG                         |
| F82 3' primer                  | CAGTCCGGACCCGGTGGGAAAGCCCAGCAAC                         |
| Oligos of SD-his-for           | CGCGACACAGGAAACAGACCatgGGCAGCAGCCATCATCATCA<br>TCATCACT |
| Oligos of SD-his-rev           | cgcgagtGATGATGATGATGATGGCTGCTGCCcatGGTCTGTTTC<br>CTGTGT |
| Oligos of SD-for               | CGCGACACAGGAAAC                                         |
| Oligos of SD-rev               | CGCGGTTTCCTGTGT                                         |
| Primer for pXW 131 (Top)       | GTATCCGGTGCCCTGGCCCCATACGCCATGGTGGTCTG                  |
| Primer for pXW 131 (Bott)      | CAGACCACCATGGCGTATGGGGCCAGGGCACCGATAC                   |
| Primer for pXW 135 (Top)       | GTATCCGGTGCCCTGGCCCCATACTGCATGGTGGTCTG                  |
| Primer for pXW 135 (Bott)      | CAGACCACCATGCAGTATGGGGCCAGGGCACCGATAC                   |
| Primer for pXW 138 (Top)       | GATCTATGTGCCGTCAGCCAATGTCAACCCGATAGTG                   |
| Primer for pXW 138 (Bott)      | CACTATCGGGTTGACATTGGCTGACGGCACATAGATC                   |
| Primer for pXW 139 (Top)       | CCGATAGTGTCCGGCCGGCTCGGTGATGACCAC                       |
| Primer for pXW 139 (Bott)      | GTGGTCATCACCGAGCCGGCCGACACTATCGG                        |
| Primer for pXW 141 (Top)       | GTATCCGGTGCCCTGTGCCCATACGCCATGGTGGTCTG                  |
| Primer for pXW 141 (Bott)      | CAGACCACCATGGCGTATGGGCACAGGGCACCGATAC                   |

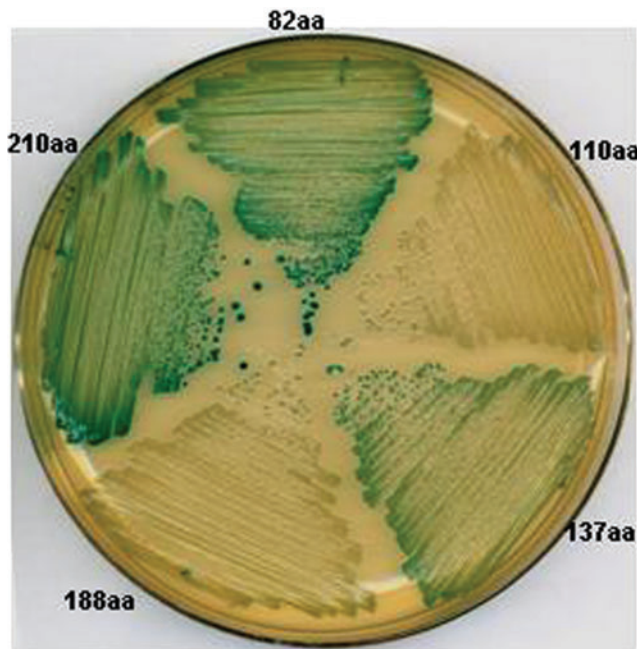

SUPPLEMENTARY FIG. S1. AP activity from the MtbVKOR-AP fusions on plate. These fusion strains were streaked out on media containing XP, a chromogenic substrate of AP.

References

1. Boyd D, Traxler B, and Beckwith J. *J Bacteriol* 175: 553–556, 1993.
2. Amann E, Ochs B, and Abel KJ. *Gene* 69: 301–315, 1998.
3. Dutton RJ, Wayman A, Wei JR, Rubin EJ, Beckwith J, Boyd D. *Proc Natl Acad Sci U S A* 107: 297–301, 2010.
